# Supplementary material for: The Widely Conserved ebo Cluster Is Involved in Precursor Transport to the Periplasm during Scytonemin Synthesis in Nostoc punctiforme
Source: PubMed Central journal article supplement (PMC6282210; doi:10.1128/mbio.02266-18), 2018-11-27

HPLC Solvent Blank

270.7995

271.2252

272.7995

277.1763

274.0877

HPLC peak at 7.8 minutes

270.7997

271.2252

272.7995

275.0922

276.0997

277.1718

274.0863

$C_{18}H_{12}NO_2$ , Mass:274.09 Da

275.0896

270

271

272

273

274

275

276

277

278

279

m/z

Intensity

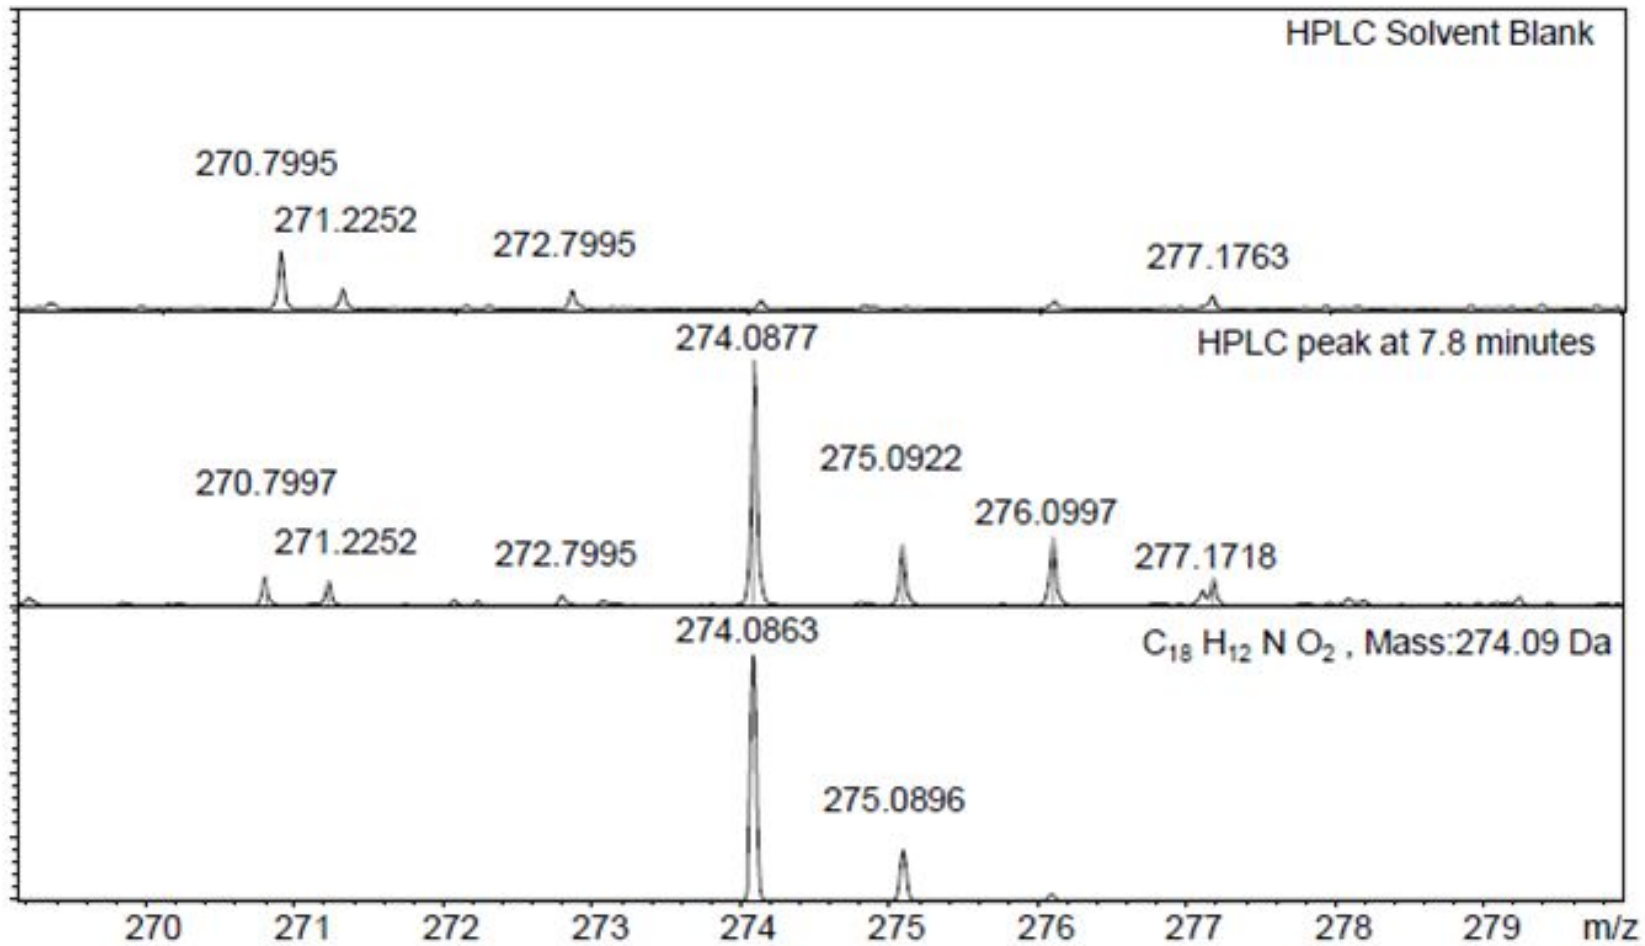

Supplement: mbo006184193sf2.pdf [file mbo006184193sf2.pdf]
