# Supplementary material for: The Widely Conserved ebo Cluster Is Involved in Precursor Transport to the Periplasm during Scytonemin Synthesis in Nostoc punctiforme
Source: PubMed Central journal article supplement (PMC6282210; doi:10.1128/mbio.02266-18), 2018-11-27

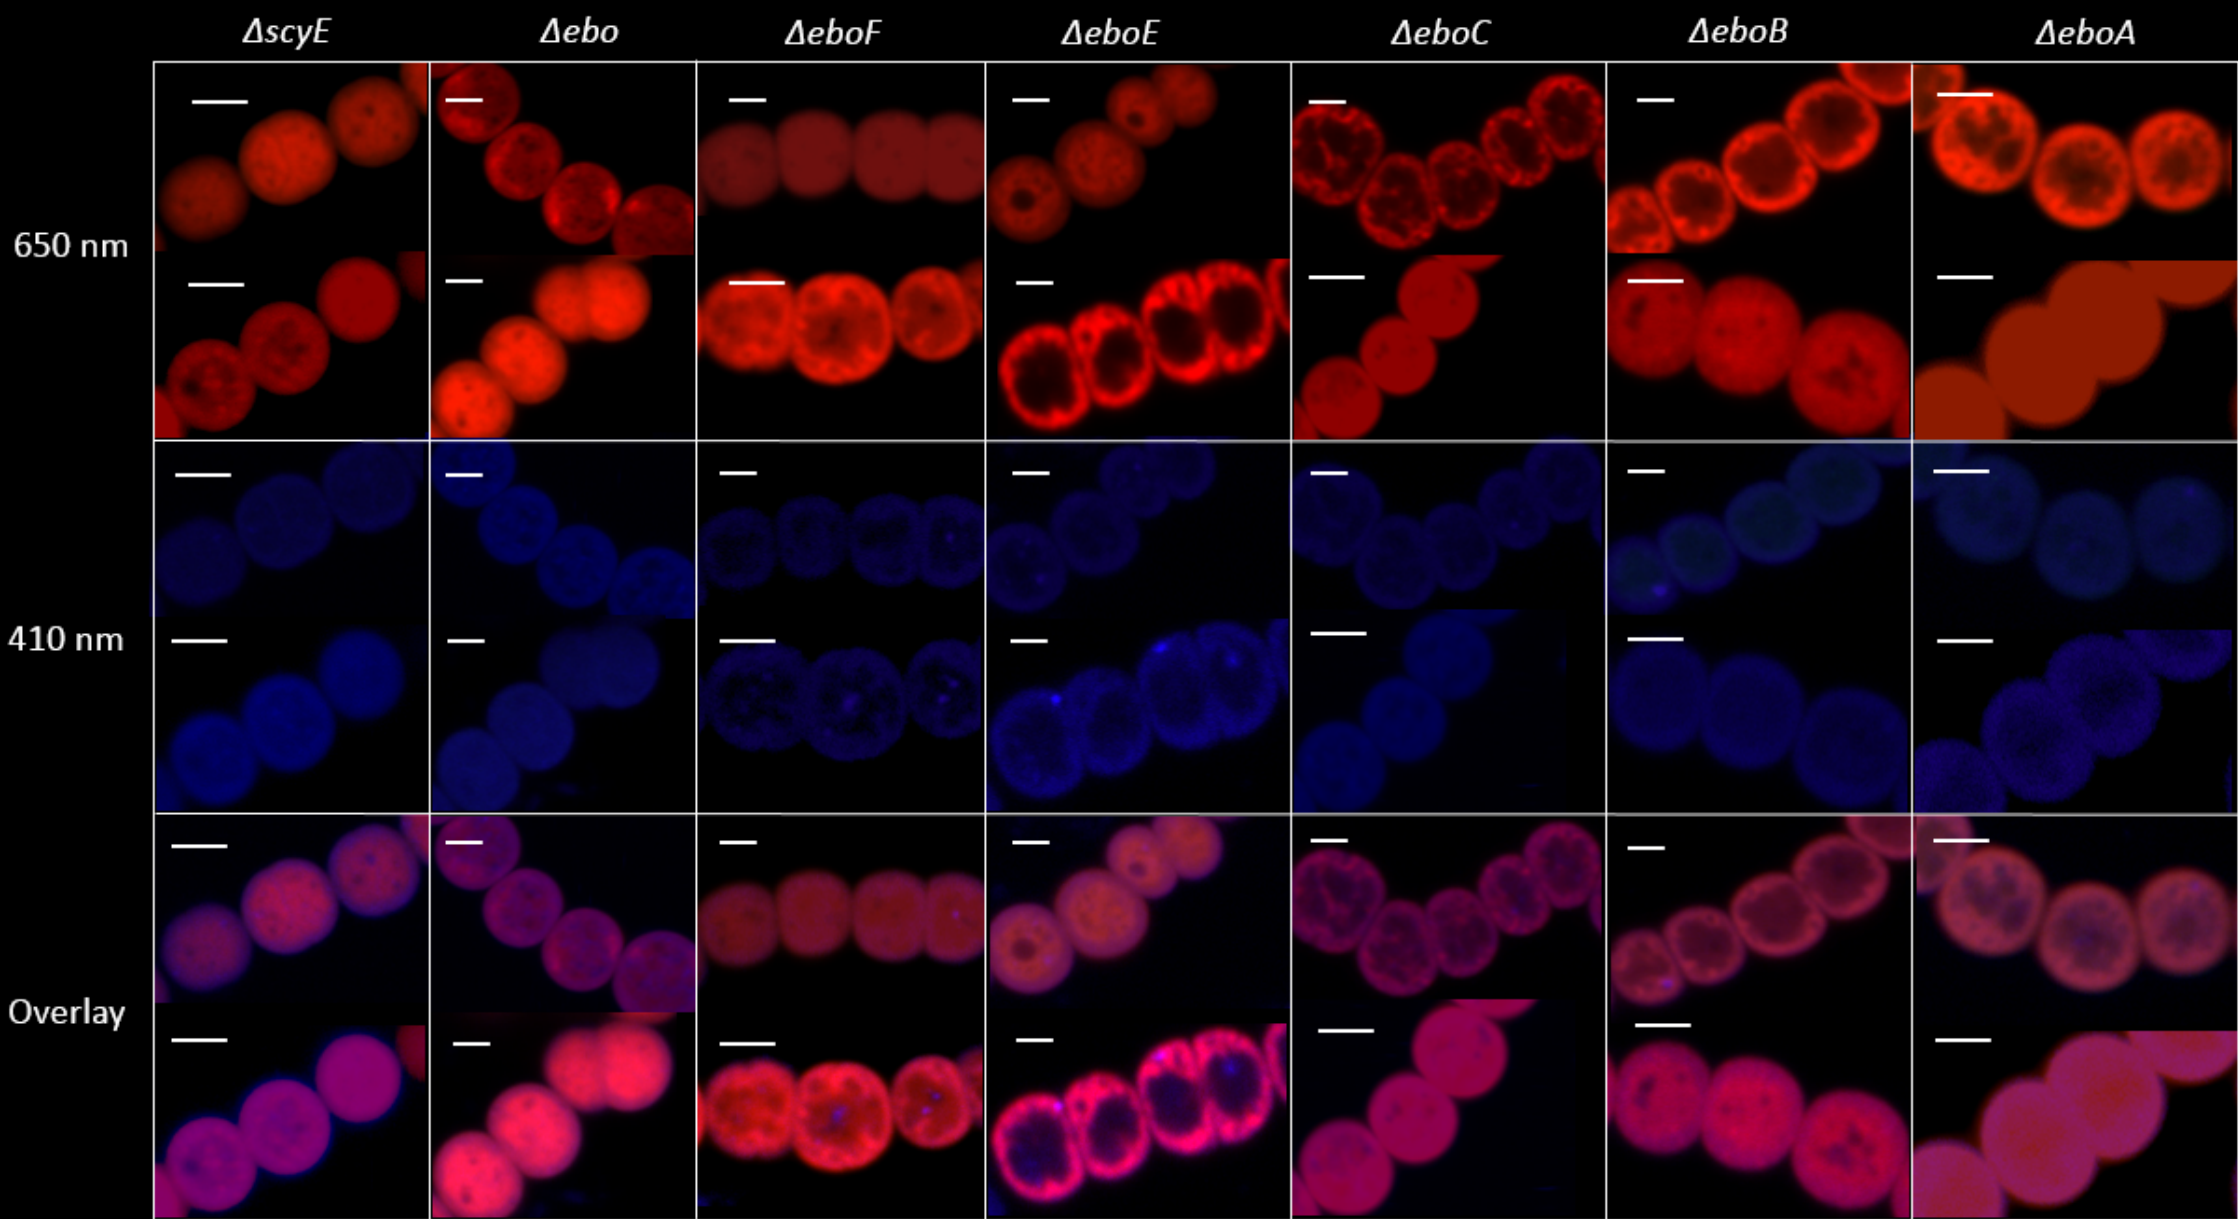

Supplement: mbo006184193sf3.pdf [file mbo006184193sf3.pdf]
