# Supplementary material for: The Widely Conserved ebo Cluster Is Involved in Precursor Transport to the Periplasm during Scytonemin Synthesis in Nostoc punctiforme
Source: PubMed Central journal article supplement (PMC6282210; doi:10.1128/mbio.02266-18), 2018-11-27

|                      |                             |                             |                             |               |
|----------------------|-----------------------------|-----------------------------|-----------------------------|---------------|
| <b>Primer set</b>    | <i>eboB</i>                 | <i>eboC</i>                 | <i>eboE</i>                 | <i>eboF</i>   |
| <b>Mutant strain</b> | $\Delta eboA$ $\Delta eboB$ | $\Delta eboB$ $\Delta eboC$ | $\Delta eboC$ $\Delta eboE$ | $\Delta eboE$ |
| <b>Product size</b>  | 0.16 kb                     | 0.19 kb                     | 0.22 kb                     | 0.20 kb       |

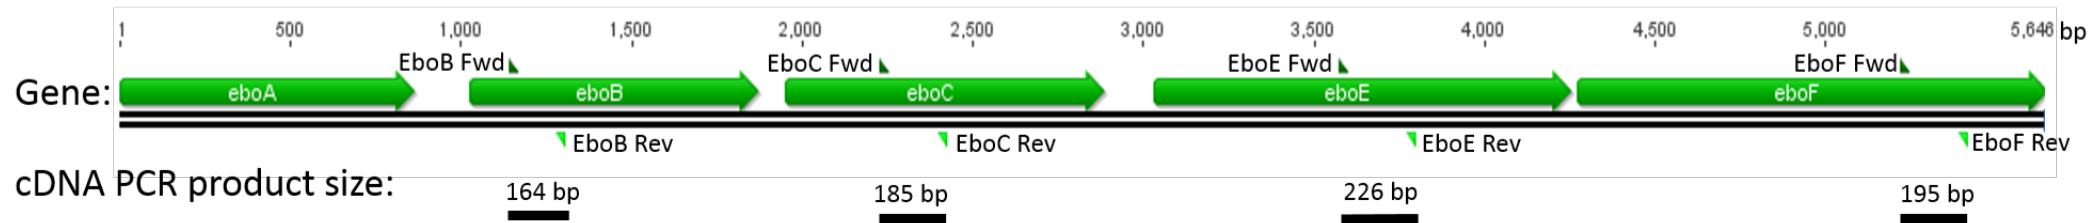

Supplement: mbo006184193sf7.pdf [file mbo006184193sf7.pdf]
