# Supplementary material for: The Widely Conserved ebo Cluster Is Involved in Precursor Transport to the Periplasm during Scytonemin Synthesis in Nostoc punctiforme
Source: PubMed Central journal article supplement (PMC6282210; doi:10.1128/mbio.02266-18), 2018-11-27
Supplement: mbo006184193st1.pdf [file mbo006184193st1.pdf]

# Supplementary Table S1

Table S1 A. *N. punctiforme* strains and oligonucleotides used in this work.

| <i>N. punctiforme</i> strains | Relevant characteristics and details of mutants construction                                                                                                                                                                                               | Oligonucleotides used to confirm homozygosity of mutants                                                                                      |
|-------------------------------|------------------------------------------------------------------------------------------------------------------------------------------------------------------------------------------------------------------------------------------------------------|-----------------------------------------------------------------------------------------------------------------------------------------------|
| WT                            | UCD 153: ATCC 29133 wild-type derivate, scytonemin producer (Campbell <i>et al.</i> , 2007)                                                                                                                                                                |                                                                                                                                               |
| $\Delta scyE$                 | scytoneminless mutant (Ferreira and Garcia-Pichel, 2016)                                                                                                                                                                                                   |                                                                                                                                               |
| $\Delta ebo$                  | Npun_F5232 to Npun_F5236 knockout. Primers used to create a 5364 bp deletion:<br>sat-XhoI: ATCATCCTCGAGCGACAAATCCACCTGGTGGACTTC<br>satI1: ACGCGGTACAGCACTAAATGCC<br>satI2: GGCATTTAGTGCTGTACCGCGTGGCTCTCACGGTAATATCACACCAC<br>satR: CCCGACTTCTTCAGAAATCGGG | satF: AAGTTGGGCAACTTCTCCTG<br>satR2: GCTGGATAAGGGTTACGTAG<br>satF2: GGGTAAACAAGCCTACCATC<br>F5234R<br>satF3: GCCAAACTGGGCAGATGAAAGC<br>F5232R |
| $\Delta eboA$                 | Npun_F5232 knockout. Primers used to create a 606 bp deletion:<br>sat-XhoI<br>satI1<br>F5232I2: GGCATTTAGTGCTGTACCGCGTTGTGCCGAGTCTCCTTTACC<br>F5232R: GCCGATGGAATCCACCATAAGG                                                                               | satF<br>F5233I1<br>satR2<br>F5232F: CTGTAGGGCGGTTTGGCGGATAG                                                                                   |
| $\Delta eboB$                 | Npun_F5233 knockout. Primers used to create a 720 bp deletion:<br>sat-XhoI<br>F5233I1: CGTAAGTAGTACGGGAACAC<br>F5233I2: GTGTTCCCGTACTACTTACGCGCAAACCTGGGCAGATGAAAGC<br>F5233R: ACGCGCAAACACAGATTGTGG                                                       | F5232F<br>F5234I1<br>F5233R2: AAGCGTTCACGCTACAAGAC<br>F5235L-XhoI                                                                             |
| $\Delta eboC$                 | Npun_F5234 knockout. Primers used to create a 657 bp deletion:<br>F5234L-XhoI: ATCGCGCTCGAGAAGTTGGGCAACTTCTCCTG<br>F5234I1: AGCCGGAAGCAGCGAAACCTAC<br>F5234I2: GTAGGTTTCGCTGCTTCCGGCTTAGCCGAAATATCCGAAATGCG<br>F5234R: CAGCCTCTATACTGCCTTTC                | satF3<br>F5232R<br>F5234R2: CCGCCGCGGTATAAACCACTTG<br>F5234F: CGATCGCAGCACTACCATTTCG                                                          |
| $\Delta eboE$                 | Npun_F5235 knockout. Primers used to create a 768 bp deletion:<br>F5235L-XhoI: ATCGCGCTCGAGGCTAGTCAGTTTGGCATCCAACAC<br>F5232R<br>F5235I2: CCTTATGGTGGATTCCATCGGCCTACCCAAGATGACATCGCTACTG<br>F5235R: CTGAATACACATCCGCCACTTAGG                               | F5234F<br>F5236I1<br>F5233R<br>F5235F: ACGTCGCACTGATGGTACTG                                                                                   |
| $\Delta eboF$                 | Npun_F5236 knockout. Primers used to create a 1131 bp deletion:<br>F5236L-XhoI: ATCGCGCTCGAGGGCGGATATTCTGTAGGTTTCG<br>F5236I1: ATTGACGCTACCTGTCTTTTCG<br>F5236I2: CGAAAGGACAGGTAGCGTCAATTGGCTCTCACGGTAATATCAC<br>satR                                      | F5235F<br>F5234R<br>F5236R2: GCGACAATCCCATGTTTCATC<br>satF2                                                                                   |

Underlined letters indicate introduced XhoI restriction endonuclease cleavage site.

Table S1 B. *E. coli* strains and oligonucleotides used in this work

| <i>E. coli</i> strains                                 | Relevant characteristics and details of mutant construction                                                                                                               | Oligonucleotides used to confirm mutants |
|--------------------------------------------------------|---------------------------------------------------------------------------------------------------------------------------------------------------------------------------|------------------------------------------|
| <i>E. coli</i> harboring pRSFDuet: <i>scyABC</i>       | Forward primer containing NcoI restriction site:<br>5'-GCCGCCCATATGACTATACTGGTTCC-3'<br>Reverse primer containing SacI restriction site:<br>5'-TTAGTTGGGAAGTGGGATTCTTG-3' | 5'-<br>GCCGCCCATATGACTATACTGGTTCC-<br>3' |
| <i>E. coli</i> harboring pRSFDuet: <i>scyABC-scyEF</i> | Forward primer containing NdeI restriction site<br>5'-TGGGATTCGTTGTCTTTAAACCC-3'<br>Reverse primer containing FseI restriction site<br>5'-TCAGCATTGTTGCTTTTGCAGTTCTTTC-3' | 5'- TGGGATTCGTTGTCTTTAAACCC-<br>3'       |
