# Supplementary material for: The Widely Conserved ebo Cluster Is Involved in Precursor Transport to the Periplasm during Scytonemin Synthesis in Nostoc punctiforme
Source: PubMed Central journal article supplement (PMC6282210; doi:10.1128/mbio.02266-18), 2018-11-27
Supplement: mbo006184193st2.pdf [file mbo006184193st2.pdf]

**Supplementary Table S2**

| <i>ebo</i> cDNA target | Forward primer                 | Reverse primer            |
|------------------------|--------------------------------|---------------------------|
| <i>eboB</i>            | GCTAGTCAGTTTGGCATCCAACAC       | GCTTCTGTCATGTCGTCATAGCC   |
| <i>eboC</i>            | CCGCCGCCGTATAAACCACTTG         | ATCGCGCTCGAGGCTGTAGGTTTCG |
| <i>eboE</i>            | CCATATTGATTTAGAACCTGAGCCTGATGG | ACGCGCAAACACAGATTGTGG     |
| <i>eboF</i>            | GGGTAACAAGCCTACCATC            | GGAAATTTTATTGCGGATCGAGG   |
